# Supplementary material for: Local chromosome context is a major determinant of crossover pathway biochemistry during budding yeast meiosis
Source: PubMed Central journal article supplement (PMC5222560; doi:10.7554/elife.19669), 2016-11-18
Supplement: elife-19669-supp1.pdf [file elife-19669-supp1.pdf]

## Supplementary File 1—Yeast strains

| Strain  | Genotype                                                                                                                                                                                                                                                                                                                                 | Used in figures                             |
|---------|------------------------------------------------------------------------------------------------------------------------------------------------------------------------------------------------------------------------------------------------------------------------------------------------------------------------------------------|---------------------------------------------|
| MJL3617 | <p><i>MATa ho::LYS2 lys2 leu2 nuclΔ::LEU2 VMA1-103 trp1::hisG</i><br/>           -----<br/> <i>MATα ho::LYS2 lys2 leu2 nuclΔ::LEU2 VMA1-103 trp1::hisG</i></p> <p><i>arg4Δ(eco47III-hpaI) ura3::Ty1 his4'-URA3-[arg4-VRS103]-'his4</i><br/>           -----<br/> <i>arg4Δ(eco47III-hpaI) ura3::Ty1 his4::natMX-[arg4-VRS]-KlTRP1</i></p> | S1, 2                                       |
| MJL3627 | <p><i>MATa ho::LYS2 lys2 leu2 nuclΔ::LEU2 VMA1-103 trp1::hisG</i><br/>           -----<br/> <i>MATα ho::LYS2 lys2 leu2 nuclΔ::LEU2 VMA1-103 trp1::hisG</i></p> <p><i>arg4Δ(eco47III-hpaI) ura3::Ty1-[arg4-VRS103]-URA3</i><br/>           -----<br/> <i>arg4Δ(eco47III-hpaI) ura3::natMX-[arg4-VRS]-KlTRP1</i></p>                       | S1, 2                                       |
| MJL3618 | <p>MJL3617 + <i>pCUP1-VDE-kanMX-pCUP1-CUP1</i><br/>           -----<br/> <i>CUP1</i></p>                                                                                                                                                                                                                                                 | 1, 2, S2, 3, S3-1, S3-2<br>4, S4-1, 5, S5-1 |
| MJL3624 | <p>MJL3627 + <i>pCUP1-VDE-kanMX-pCUP1-CUP1</i><br/>           -----<br/> <i>CUP1</i></p>                                                                                                                                                                                                                                                 | 1, 2, S2, 3, S3-1, S3-2<br>4, S4-1, 5, S5-1 |
| MJL3645 | <p>MJL3617 + <i>sae2Δ::hphMX</i><br/>           -----<br/> <i>sae2Δ::hphMX</i></p>                                                                                                                                                                                                                                                       | S1                                          |
| MJL3643 | <p>MJL3627 + <i>sae2Δ::hphMX</i><br/>           -----<br/> <i>sae2Δ::hphMX</i></p>                                                                                                                                                                                                                                                       | S1                                          |

| <u>Strain</u> | <u>Genotype</u>                                                                                                                                                                                                                                     | <u>Used in figures</u> |
|---------------|-----------------------------------------------------------------------------------------------------------------------------------------------------------------------------------------------------------------------------------------------------|------------------------|
| MJL3670       | MJL3617 + $\frac{pCUP1-VDE-hphMX-pCUP1-CUP1}{CUP1} \frac{mlh3\Delta::kanMX}{mlh3\Delta::kanMX}$                                                                                                                                                     | 3, S3-1, S3-2, 4, S4-1 |
| MJL3669       | MJL3627 + $\frac{pCUP1-VDE-hphMX-pCUP1-CUP1}{CUP1} \frac{mlh3\Delta::kanMX}{mlh3\Delta::kanMX}$                                                                                                                                                     | 3, S3-1, S3-2, 4, S4-1 |
| MJL3729       | MJL3617 + $\frac{pCUP1-VDE-hphMX-pCUP1-CUP1}{CUP} \frac{yen1\Delta::hphMX}{yen1\Delta::hphMX} \frac{slx1\Delta::natMX}{slx1\Delta::URA3}$<br><br>$\frac{kanMX-pCLB2-3HA-MMS4}{kanMX-pCLB2-3HA-MMS4}$                                                | 3, S3-1, S3-2, 4, S4-1 |
| MJL3728       | MJL3627 + $\frac{pCUP1-VDE-hphMX-pCUP1-CUP1}{CUP} \frac{yen1\Delta::hphMX}{yen1\Delta::hphMX} \frac{slx1\Delta::natMX}{slx1\Delta::URA3}$<br><br>$\frac{kanMX-pCLB2-3HA-MMS4}{kanMX-pCLB2-3HA-MMS4}$                                                | 3, S3-1, S3-2, 4, S4-1 |
| MJL3726       | MJL3617 + $\frac{pCUP1-VDE-hphMX-pCUP1-CUP1}{CUP1} \frac{mlh3\Delta::kanMX}{mlh3\Delta::kanMX}$<br><br>$\frac{pCLB2-3HA-MMS4::kanMX}{pCLB2-3HA-MMS4::kanMX} \frac{slx1\Delta::natMX}{slx1\Delta::URA3} \frac{yen1\Delta::hphMX}{yen1\Delta::hphMX}$ | 3, S3-1, S3-2          |
| MJL3725       | MJL3627 + $\frac{pCUP1-VDE-hphMX-pCUP1-CUP1}{CUP1} \frac{mlh3\Delta::kanMX}{mlh3\Delta::kanMX}$<br><br>$\frac{pCLB2-3HA-MMS4::kanMX}{pCLB2-3HA-MMS4::kanMX} \frac{slx1\Delta::natMX}{slx1\Delta::URA3} \frac{yen1\Delta::hphMX}{yen1\Delta::hphMX}$ | 3, S3-1, S3-2          |

| <u>Strain</u> | <u>Genotype</u>                                                                                                                                                                                                                    | <u>Used in figures</u> |
|---------------|------------------------------------------------------------------------------------------------------------------------------------------------------------------------------------------------------------------------------------|------------------------|
| MJL3806       | MJL3617 + <i>pCUP1-VDE-kanMX-pCUP1-CUP1 pch2Δ::URA3</i><br>-----<br><i>pCUP1-CUP1 pch2Δ::URA3</i>                                                                                                                                  | 4, S4-1, S4-2          |
| MJL3803       | MJL3627 + <i>pCUP1-VDE-kanMX-pCUP1-CUP1 pch2Δ::URA3</i><br>-----<br><i>pCUP1-CUP1 pch2Δ::URA3</i>                                                                                                                                  | 4, S4-1, S4-2          |
| MJL3804       | MJL3617 + <i>pCUP1-VDE-kanMX-pCUP1-CUP1 pch2Δ::URA3 mlh3Δ::kanMX</i><br>-----<br><i>pCUP1-CUP1 pch2Δ::URA3 mlh3Δ::kanMX</i>                                                                                                        | 4, S4-1, S4-2          |
| MJL3805       | MJL3627 + <i>pCUP1-VDE-kanMX-pCUP1-CUP1 pch2Δ::URA3 mlh3Δ::kanMX</i><br>-----<br><i>pCUP1-CUP1 pch2Δ::URA3 mlh3Δ::kanMX</i>                                                                                                        | 4, S4-1, S4-2          |
| MJL3866       | MJL3617 + <i>pCUP1-VDE-kanMX-pCUP1-CUP1 pch2Δ::URA3 yen1Δ::hphMX</i><br>-----<br><i>pCUP1-CUP1 pch2Δ::URA3 yen1Δ::hphMX</i><br><br><i>slx1Δ::natMX pCLB2-3HA-MMS4::kanMX</i><br>-----<br><i>slx1Δ::natMX pCLB2-3HA-MMS4::kanMX</i> | 4, S4-1, S4-2          |
| MJL3858       | MJL3627 + <i>pCUP1-VDE-kanMX-pCUP1-CUP1 pch2Δ::URA3 yen1Δ::hphMX</i><br>-----<br><i>pCUP1-CUP1 pch2Δ::URA3 yen1Δ::hphMX</i><br><br><i>slx1Δ::natMX pCLB2-3HA-MMS4::kanMX</i><br>-----<br><i>slx1Δ::natMX pCLB2-3HA-MMS4::kanMX</i> | 4, S4-1, S4-2          |
| MJL3606       | MJL3617 + <i>pCUP1-VDE-kanMX-pCUP1-CUP1 spo11-Y135F-HA3-his6::kanMX</i><br>-----<br><i>pCUP1-CUP1 spo11-Y135F-HA3-his6::kanMX</i>                                                                                                  | 5, S5-1, S5-2          |

| <u>Strain</u> | <u>Genotype</u>                                                                                                                                                                                                                                                         | <u>Used in figures</u> |
|---------------|-------------------------------------------------------------------------------------------------------------------------------------------------------------------------------------------------------------------------------------------------------------------------|------------------------|
| MJL3605       | MJL3627 + $\frac{pCUP1-VDE-kanMX-pCUP1-CUP1}{pCUP1-CUP1} \frac{spo11-Y135F-HA3-his6::kanMX}{spo11-Y135F-HA3-his6::kanMX}$                                                                                                                                               | 5, S5-1, S5-2          |
| MJL3697       | MJL3617 + $\frac{pCUP1-VDE-hphMX-pCUP1-CUP1}{CUP1} \frac{mlh3\Delta::kanMX}{mlh3\Delta::kanMX}$<br><br>$\frac{spo11-Y135F-HA3-his6::kanMX}{spo11-Y135F-HA3-his6::kanMX}$                                                                                                | 5B, S5-1, S5-2         |
| MJL3696       | MJL3627 + $\frac{pCUP1-VDE-hphMX-pCUP1-CUP1}{CUP1} \frac{mlh3\Delta::kanMX}{mlh3\Delta::kanMX}$<br><br>$\frac{spo11-Y135F-HA3-his6::kanMX}{spo11-Y135F-HA3-his6::kanMX}$                                                                                                | 5C, S5-1, S5-2         |
| MJL3731       | MJL3617 + $\frac{pCUP1-VDE-hphMX-pCUP1-CUP1}{CUP1} \frac{yen1\Delta::hphMX}{yen1\Delta::hphMX} \frac{slx1\Delta::natMX}{slx1\Delta::URA3}$<br><br>$\frac{pCLB2-3HA-MMS4::kanMX}{pCLB2-3HA-MMS4::kanMX} \frac{spo11-Y135F-HA3-his6::kanMX}{spo11-Y135F-HA3-his6::kanMX}$ | 5B, S5-1, S5-2         |
| MJL3730       | MJL3627 + $\frac{pCUP1-VDE-hphMX-pCUP1-CUP1}{CUP1} \frac{yen1\Delta::hphMX}{yen1\Delta::hphMX} \frac{slx1\Delta::natMX}{slx1\Delta::URA3}$<br><br>$\frac{pCLB2-3HA-MMS4::kanMX}{pCLB2-3HA-MMS4::kanMX} \frac{spo11-Y135F-HA3-his6::kanMX}{spo11-Y135F-HA3-his6::kanMX}$ | 5C, S5-1, S5-2         |

**Supplementary File 1—Yeast Strains.** The *ura3::Ty* allele contains a Ty element near a *RsaI* site in *URA3* coding sequences (T.-C. Wu and M. Lichten, unpublished observations). *his4'-URA3-[arg4-VRS103]-'his4* and *ura3::Ty-[arg4-VRS103]-URA3* inserts are identical to inserts in MJL1077 and MJL1094 (Wu & Lichten 1995) except that they contain the *arg4-VRS103* allele (see Materials and Methods). In *his4::natMX-[arg4-VRS]-KITRP1*, *natMX* sequences (Goldstein & McCusker 1999) replace sequences from chromosome V coordinate 66033 to +483bp downstream of *URA3* and *K. lactis TRP1* sequences (Stark & Milner 1989) replace sequences from +350bp downstream of *ARG4* to chromosome V coordinate 67716; in *ura3::natMX-[arg4-VRS]-KITRP1*, *natMX* sequences (Goldstein & McCusker 1999) replace sequences from chromosome III coordinate 115943 to +483bp downstream of *URA3* and *K. lactis TRP1* sequences (Stark & Milner 1989) replace sequences from +356bp downstream of *ARG4* to chromosome III coordinate 116919 (all yeast genome coordinates from Saccharomyces Genome Database build #R64-2-1). *pCUP1-VDE-kanMX-pCUP1-CUP1* contains plasmid pMJ920 (see Materials and Methods) integrated at the *CUP1* locus; in *pCUP1-VDE-hphMX-pCUP1-CUP1*, the G418-resistance module is replaced by a hygromycin-resistance module (Goldstein & McCusker 1999). The following alleles have been previously described: *kanMX-pCLB2-3HA-MMS4* (Jessop et al. 2006); *spo11-Y135F-HA3-his6::kanMX* (Kee & Keeney 2002). *mlh3Δ::kanMX*, *slx1Δ::natMX* and *slx1Δ::URA3* and *yen1Δ::hphMX* were constructed by an exact replacement of the relevant coding sequences by the indicated drug-resistance module (Goldstein & McCusker 1999) or by *URA3* coding sequences. *pch2* mutant strain was constructed by replacing the wild type *PCH2* locus with the *pch2Δ::URA3* allele from pSS52 (San-Segundo & Roeder 1999) where the +266 to +1741 coding region of *PCH2* (*AccI-BamHI* fragment) has been replaced with a *URA3* fragment (*ClaI-BamHI*).

## References

- Goldstein, A.L., McCusker, J.H., 1999. Three new dominant drug resistance cassettes for gene disruption in *Saccharomyces cerevisiae*. *Yeast*, 15, 1541–1553.
- Jessop, L., Rockmill, B., Roeder, G.S., Lichten, M., 2006. Meiotic chromosome synapsis-promoting proteins antagonize the anti-crossover activity of Sgs1. *PLoS Genetics*, 2, e155.
- Kee, K., Keeney, S., 2002. Functional interactions between *SPO11* and *REC102* during initiation of meiotic recombination in *Saccharomyces cerevisiae*. *Genetics*, 160, 111–122.
- Saccharomyces Genome Database [WWW Document], URL <http://www.yeastgenome.org>.
- San-Segundo, P.A., Roeder, G.S., 1999. Pch2 links chromatin silencing to meiotic checkpoint control. *Cell*, 97, 313–324.
- Stark, M.J., Milner, J.S., 1989. Cloning and analysis of the *Kluyveromyces lactis TRP1* gene: a chromosomal locus flanked by genes encoding inorganic pyrophosphatase and histone H3. *Yeast*, 5, 35–50.
- Wu, T.C., Lichten, M., 1995. Factors that affect the location and frequency of meiosis-induced double-strand breaks in *Saccharomyces cerevisiae*. *Genetics*, 140, 55–66.
