# Supplementary material for: Local chromosome context is a major determinant of crossover pathway biochemistry during budding yeast meiosis
Source: eLife. 2016 Nov 18;5:e19669. doi: 10.7554/eLife.19669 (PMC5222560; doi:10.7554/eLife.19669)
Supplement: Supplementary file 2. — DOI: http://dx.doi.org/10.7554/eLife.19669.018 [file elife-19669-supp2.xlsx]

## Sheet: Guide
Primary data for Medhi et al., "Local chromosome context is a major determinant..."
Primary data for each figure (figure supplements included) are included in the indicated sheet.
Panels are indicated in the header of each table.
Blank cells indicate missing values

## Sheet: Figure 1
Figure 1- Figure Supplement 1
Panel A) Spo11 DSBs in sae2 mutants at HIS4 and URA3 (% total lane signal)
hours in meiosis	DSB1, HIS4	DSB2, HIS4	DSB1, URA3	DSB2, URA3
8	4.47	0.88	0.84	0.11
9	5.44	0.9	1.01	0.13
Panel D) Spo11-initiated COs (total and VDE-resistant) at HIS4 and URA3 (% total lane signal)
hours in meiosis	his4-total COs	his4-VDE-resistant COs	ura3-total COs	ura3-VDE-resistant COs
0	0	0	0	0
1	0	0	0	0
2	0	0	0	0
3	0	0	0	0
4	0	0	0	0
5	0.76	0	0.16	0
6	1.72	0.38	0.37	0
7	2.23	0.62	0.45	0
8	2.15	0.58	0.46	0
9	2.01	0.47	0.42	0

## Sheet: Figure 2
Figure 2
A) Uncut parental arg4-VRS locus remaining (%)
	URA3		HIS4
hours in meiosis	experiment 1	experiment 2	experiment 1	experiment 2
0	100	100	100	100
1	99.7406	94.6375	103.81	95.8222
2	89.6307	83.257	98.1482	84.7632
3	64.4423	53.3761	76.8625	63.0514
4	42.0263	22.4215	61.5368	42.661
5	28.8509	23.2086	41.6986	21.8366
6	20.1887	12.1068	23.6697	9.15341
7	16.4026	8.79852	16.2197	5.06346
8	15.8271	10.1	15.049	4.6375
9	17.1757	12.8136	15.6024	4.63389
B) Steady-state VDE DSB levels (% total lane signal)
	URA3		HIS4
hours in meiosis	experiment 1	experiment 2	experiment 1	experiment 2
0	0	0	0	0
1	2.67872	2.26449	0.67	0.952381
2	6.66667	4.80648	3.07	4.36642
3	11.0471	8.52669	5.66	7.0308
4	14.2297	8.40936	5.13	5.52498
5	3.39885	3.37079	4.3	3.30614
6	2.26904	1.90217	2.55	1.82474
7	2.11588	1.30528	1.83	1.47524
8	1.64915	1.14363	1.21	1.08838
9	1.15498	1.03442	1.14	1.0501
C) VDE initiated NCOs and COs (with VDE-resistant Spo11 initiated COs for scale)(% total lane signal)
	URA3					HIS4
	NCO		CO		Spo11 COs	NCO		CO		Spo11 COs
hours in meiosis	experiment 1	experiment 2	experiment 1	experiment 2	experiment 1	experiment 1	experiment 2	experiment 1	experiment 2	experiment 1
	0	0	0	0	0	0	0	0	0	0
0	0	0.08	0	0	0	0	0	0	0	0
1	0.01	0.01	0	0	0	0	0	0	0	0
2	0.45	0.68	0	0	0	0.16	0.67	0	0	0
3	1.69	3.13	0	0	0	1.56	2.98	0	0	0
4	8.88	14.14	3.77	3.905	0	6.24	11.39	2.26	4.535	0
5	17.71	22.24	7.51	6.53	0	14.96	20.64	7.02	9.55	0.38
6	20.89	24.1	8.285	7.415	0	19.56	23.78	8.63	11.365	0.62
7	19.75	23.82	7.895	7.445	0	15.81	24.97	9.61	11.855	0.58
8	21.12	23.81	7.99	7.095	0	20.32	24.74	8.09	11.55	0.47
9
Figure 2-Figure Supplement 1
A) Remaining chromosome material at 9 hours (% of 0 hours)
arg4-VRS at HIS4		arg4-VRS103 at HIS4		arg4-VRS at URA3		arg4-VRS103 at URA3
experiment 1	experiment 2	experiment 1	experiment 2	experiment 1	experiment 2	experiment 1	experiment 2
73.4	62.3	99.44	82.74	75.03	84.39	84.8	109.97
B) Fraction of VDE DSBs repaired as interhomolog recombinants (%)
	URA3		HIS4
hours in meiosis	experiment 1	experiment 2	experiment 1	experiment 2
0	0	0	0	0
1	3.25372	0	0	0
2	0.130265	0.185995	0	0
3	3.18098	2.44078	1.47194	3.80233
4	8.79961	5.62221	8.63309	10.8978
5	50.8679	34.6564	31.0332	42.7217
6	73.8231	58.5759	61.2939	69.683
7	77.4467	65.3012	71.6209	77.6252
8	76.9424	62.3115	63.6933	80.9725
9	79.5498	65.7012	71.652	79.7931

## Sheet: Figure 3
Figure 3
A) COs at HIS4 (% of total lane signal)
	WT		mlh3		mms4-mn yen1 slx1		mlh3 mms4-mn yen1 slx1
hours in meiosis	experiment 1	experiment 2	experiment 1	experiment 2	experiment 1	experiment 2	experiment 1	experiment 2
0	0	0	0	0	0	0	0	0
1	0	0	0	0	0	0	0	0
2	0	0	0	0	0	0	0	0
3	0	0	0	0	0	0	0	0
4	0	0	0	0	0.51	0	0	0
5	2.26	4.535	1.395	1.58	3.355	2.555	0.395	0.51
6	7.02	9.55	3.13	3.305	5.96	4.805	1.23	1.315
7	8.63	11.365	4.12	4.255	6.67	6.04	1.885	2.105
8	9.61	11.855	3.59	4.77	7.335	7.18	2.38	2.165
9	8.09	11.55	3.995	4.795	7.385	7.015	2.8	2.295
B) COs at URA3 (% of total lane signal)
	WT		mlh3		mms4-mn yen1 slx1		mlh3 mms4-mn yen1 slx1
hours in meiosis	experiment 1	experiment 2	experiment 1	experiment 2	experiment 1	experiment 2	experiment 1	experiment 2
0	0	0	0	0	0	0	0	0
1	0	0	0	0	0	0	0	0
2	0	0	0	0	0	0	0	0
3	0	0	0	0	0	0	0	0
4	0	0	0.08	0	0	0	0	0
5	3.77	3.905	3.92	2.94	0.15	1.51	1.01	0.61
6	7.51	6.53	6.615	5.6	2.655	3.18	1.725	1.515
7	8.285	7.415	7.35	6.265	3.61	4.195	2.41	2.195
8	7.895	7.445	7.075	7.185	4.37	4.95	2.6	2.65
9	7.99	7.095	6.86	6.63	4.545	4.73	3.005	3.01
C) COs, % of wild type
HIS4				URA3
mlh3	mms4 yen1 slx1	mlh3 mms4 yen1 slx1		mlh3	mms4 yen1 slx1	mlh3 mms4 yen1 slx1
41.7224	70.3442	23.4521		91.2079	61.1175	37.0255
D) NCOs, % of wild type
HIS4				URA3
mlh3	mms4 yen1 slx1	mlh3 mms4 yen1 slx1		mlh3	mms4 yen1 slx1	mlh3 mms4 yen1 slx1
94.6528	102.679	85.9157		108.09	100.836	99.1073
Figure 3-Figure Supplement 1
A) Steady state DSBs and NCOs at HIS4 (% total lane signal)
DSBs	WT		mlh3		mms4-mn yen1 slx1		mlh3 mms4-mn yen1 slx1
hours in meiosis	experiment 1	experiment 2	experiment 1	experiment 2	experiment 1	experiment 2	experiment 1	experiment 2
0	0	0	0	0	0	0	0	0
1	0.67	0.952381	1.30318	3.40864	0.799532	0.877368	0.845012	1.48685
2	3.07	4.36642	5.81627	6.14525	5.95215		2.86494	5.96959
3	5.66	7.0308	6.14602	5.68374	10.5556	8.82293	7.62093	7.71549
4	5.13	5.52498	3.86619	4.0652	6.00887	5.76375	5.85783	5.15177
5	4.3	3.30614	3.17494	2.70876	2.38202	3.3934	3.55758	3.44353
6	2.55	1.82474	1.31775	1.6129	0.872679	1.45183	2.2087	1.89732
7	1.83	1.47524	0.971712	0.882957	0.830527		1.24075	1.2079
8	1.21	1.08838	0.826446	0.825423	1.22117	1.28147	1.07426	1.05381
9	1.14	1.0501	0.980819	0.80289	1.7317	1.53408	1.2037	1.2071
NCOs	WT		mlh3		mms4-mn yen1 slx1		mlh3 mms4-mn yen1 slx1
hours in meiosis	experiment 1	experiment 2	experiment 1	experiment 2	experiment 1	experiment 2	experiment 1	experiment 2
0	0	0	0	0	0	0	0	0
1	0	0	0	0	0	0	0	0
2	0	0	0	0	0	0	0	0
3	0.16	0.67	0.51	0.44	0.85	0.57	0	0.27
4	1.56	2.98	2.09	1.76	4.81	2.85	0.78	1.69
5	6.24	11.39	7.57	7.56	12.94	10.61	3.34	5.47
6	14.96	20.64	14.72	14.19	18.93	17.26	10.04	11.68
7	19.56	23.78	19.76	17.37	20.17	19.84	13.92	16.16
8	15.81	24.97	20.75	20.36	21.53	22.44	17.38	18.03
9	20.32	24.74	19.63	20.51	22.06	22.11	19.12	19.22
B) Steady state DSBs and NCOs at URA3 (% total lane signal)
DSBs	WT		mlh3		mms4-mn yen1 slx1		mlh3 mms4-mn yen1 slx1
hours in meiosis	experiment 1	experiment 2	experiment 1	experiment 2	experiment 1	experiment 2	experiment 1	experiment 2
0	0	0	0	0	0	0	0	0
1	2.67872	2.26449	3.09071	3.01607	0	3.02083	1.59646	1.40845
2	6.66667	4.80648	6.97383	4.9685	5.25173	6.72907	5.11474	4.34441
3	11.0471	8.52669	10.7704	7.44804	10.2134	10.8783	8.73206	8.13235
4	14.2297	8.40936	9.93538	6.16218	8.40009	8.78412	5.76923	7.49404
5	3.39885	3.37079	3.04321	3.30033	6.47044	5.34254	3.52385	4.54642
6	2.26904	1.90217	1.8002	2.20921	3.97129	3.42015	2.30152	3.12299
7	2.11588	1.30528	1.31936	1.76118	2.63273	2.25893	2.03739	1.92633
8	1.64915	1.14363	1.2706	1.36933	2.40565		1.69133	1.66461
9	1.15498	1.03442	1.15891	1.36381	2.39719	3.08588	1.69491	1.90319
NCOs	WT		mlh3		mms4-mn yen1 slx1		mlh3 mms4-mn yen1 slx1
hours in meiosis	experiment 1	experiment 2	experiment 1	experiment 2	experiment 1	experiment 2	experiment 1	experiment 2
0	0	0	0	0	0	0	0	0
1	0	0.08	0	0	0	0.07	0	0.03
2	0.01	0.01	0	0	0	0.26	0	0
3	0.45	0.68	0.64	0.5	0.11	0.41	0.28	0.25
4	1.69	3.13	3.75	2.24	1.26	2.11	2.36	1.53
5	8.88	14.14	14.3	11.68	5.79	9.55	9.09	5.69
6	17.71	22.24	21.15	19.98	13.96	16.48	14.35	13.25
7	20.89	24.1	23.71	22.84	18.61	19.8	18.6	18.03
8	19.75	23.82	23.77	24.75	21.1	22.75	20.63	21.11
9	21.12	23.81	23.18	23.96	22.66	22.73	22.71	23.26

## Sheet: Figure 4
Figure 4
A) Hop1 ChIP at HIS4 and URA3 with inserts (immunoprecipitate/whole cell extract input)
	WT, HIS4				pch2, HIS4				WT, URA3				pch2, URA3
	Upstream primer		downstream primer		Upstream primer		downstream primer		Upstream primer		downstream primer		Upstream primer		downstream primer
hours in meiosis	experiment 1	experiment 2	experiment 1	experiment 2	experiment 1	experiment 2	experiment 1	experiment 2	experiment 1	experiment 2	experiment 1	experiment 2	experiment 1	experiment 2	experiment 1	experiment 2
0	6.69981e-05	0.000184502	6.62173e-05	0.000180786	7.38352e-05	4.11069e-05	6.69862e-05	3.11367e-05	3.6846e-05	0.000383924	4.62036e-06	0.000193698	7.82453e-05	8.03741e-05	7.29298e-05	5.55446e-05
3	0.00168702	0.00344052	0.000970137	0.00277814	0.00218113	0.0022458	0.00374199	0.00132214	0.0012419	0.00159675	0.000490455	0.000547904	0.000979611	0.00156344	0.000304238	0.000500723
4	0.0038272	0.0018173	0.0049277	0.00141369	0.000685049	0.000500689	0.000951263	0.000245392	0.00122418	0.00101189	0.000466542	0.000381083	0.00119111	0.000509678	0.000692686	0.000447763
5	0.000999071	0.00197085	0.000452816	0.00164814	0.00149863	0.000421004	0.000904781	0.000325392	3.99646e-08	0.00112909	0.000694121	0.000883313	0.000248616	0.000598223	0.000191492	0.000417488
6		0.00169597		0.00130523	0.00109742	0.00121728	0.000907788	0.000977767		0.000737998		0.000544819	0.000606107	0.000146324	0.000417514	0.000179109
7		0.000706436		0.000582923	0.000334942	0.000213705	0.000294824	0.00016492		0.000643007		0.000701825	0.000442327	0.00021906	0.000319985	0.000220517
B) COs (% total lane signal)
HIS4
	pch2		pch2 mlh3		pch2 mms4-mn yen1 slx1		WT		mlh3		mms4-mn yen1 slx1
hours in meiosis	experiment 1	experiment 2	experiment 1	experiment 2	experiment 1	experiment 2	experiment 1	experiment 2	experiment 1	experiment 2	experiment 1	experiment 2
0	0	0	0	0	0	0	0	0	0	0	0	0
1	0	0	0	0	0	0	0	0	0	0	0	0
2	0	0	0	0	0	0	0	0	0	0	0	0
3	0	0	0	0	0	0	0	0	0	0	0	0
4	1.06	0.555	0	0.43	0.505	0	0	0	0	0	0.51	0
5	3.84	1.725	0.98	2.145	1.63	1.315	2.26	4.535	1.395	1.58	3.355	2.555
6	9.7	7.395	4.77	7.33	4.045	3.855	7.02	9.55	3.13	3.305	5.96	4.805
7	11.85	11.005	8.21	9.05	5.17	5.07	8.63	11.365	4.12	4.255	6.67	6.04
8	11.86	11.215	9.1	8.92	5.99	5.395	9.61	11.855	3.59	4.77	7.335	7.18
9	10.42	11.185	8.98	8.945	6.25	5.77	8.09	11.55	3.995	4.795	7.385	7.015
URA3
	pch2		pch2 mlh3		pch2 mms4-mn yen1 slx1		WT		mlh3		mms4-mn yen1 slx1
hours in meiosis	experiment 1	experiment 2	experiment 1	experiment 2	experiment 1	experiment 2	experiment 1	experiment 2	experiment 1	experiment 2	experiment 1	experiment 2
0	0	0	0	0	0	0	0	0	0	0	0	0
1	0	0	0	0	0	0	0	0	0	0	0	0
2	0	0	0	0	0	0	0	0	0	0	0	0
3	0	0	0	0	0	0	0	0	0	0	0	0
4	0.04	0	0	0		0	0	0	0.08	0	0	0
5	2.79	0.785	0.885	0	0.105	0	3.77	3.905	3.92	2.94	0.15	1.51
6	7.42	4.365	2.705	2.315	2.125	2.225	7.51	6.53	6.615	5.6	2.655	3.18
7	9.065	6.835	4.24	5.265	3.94	3.705	8.285	7.415	7.35	6.265	3.61	4.195
8	9.215	7.055	5.085	5.445	4.795	4.71	7.895	7.445	7.075	7.185	4.37	4.95
9	9.52	7.07	4.91	5.335	5.245	5.21	7.99	7.095	6.86	6.63	4.545	4.73
C) COs, mlh3/MLH3 (%)
PCH2 mlh3/PCH2 MLH3		pch2 mlh3/pch2 MLH3
HIS4	URA3	HIS4	URA3
41.7224	91.2079	80.4499	63.2228
D) COs, mms4-mn yen1∆ slx1∆/MMS4 YEN1 SLX1 (%)
PCH2 ssn/PCH2 SSN		pch2 ssn/pch2 SSN
HIS4	URA3	HIS4	URA3
70.3442	61.1175	52.3836	60.7425
Figure 4-Figure Supplement 1
A) Hop1 ChIP at HIS4 and URA3 without inserts (immunoprecipitate/whole cell extract input)
	WT, HIS4				pch2, HIS4				WT, URA3				pch2, URA3
	Upstream primer		downstream primer		Upstream primer		downstream primer		Upstream primer		downstream primer		Upstream primer		downstream primer
hours in meiosis	experiment 1	experiment 2	experiment 1	experiment 2	experiment 1	experiment 2	experiment 1	experiment 2	experiment 1	experiment 2	experiment 1	experiment 2	experiment 1	experiment 2	experiment 1	experiment 2
0	2.23359e-05	0.000401271	2.28618e-05	0.000283489	6.54853e-05	5.03884e-05	3.87497e-05	4.43339e-05	0.00015625	0.000267607	3.53423e-05	0.000159915	6.78005e-05	5.98056e-05	9.83712e-05	5.47047e-05
3	0.00688796	0.013102	0.00438878	0.00339937	0.00631634	0.00801322	0.00276613	0.00441348	0.00077799	0.00131901	0.000267111	0.000425757	0.00064619	0.000918986	0.000272714	0.000437534
4	0.00628692	0.00395201	0.00388549	0.00210665	0.00429454	0.00323145	0.00240556	0.00124598	0.00237434	0.00061918	0.00112542	0.000277653	0.000171735	0.000163488	0.000190282	0.000130294
5	0.00787423	0.00546982	0.00279008	0.00175771	0.00121336	0.0020029	0.000313071	0.000763111	0.00065406	0.000685615	0.000322705	0.000310255	0.00038879	0.00016087	0.000271313	0.000188005
6		0.00219653		0.000946507	0.00204693	0.000498674	0.000903312	0.000184351		0.000503699		0.000404409	0.000547904	0.000600387	0.000399093	0.000384161
7		0.00124032		0.000605208	0.00170901	0.000352671	0.000674209	0.000162629		0.000271943		0.000122262	0.000256809	0.00014738	0.000206186	7.83824e-05
B) Steady state DSBs and NCOs at HIS4 (% total lane signal)
DSBs
	pch2		pch2 mlh3		pch2 mms4-mn yen1 slx1		WT		mlh3		mms4-mn yen1 slx1
hours in meiosis	experiment 1	experiment 2	experiment 1	experiment 2	experiment 1	experiment 2	experiment 1	experiment 2	experiment 1	experiment 2	experiment 1	experiment 2
0	0	0	0	0	0	0	0	0	0	0	0	0
1	3.61897	2.20755	1.29923	1.73965	1.57948	1.28384	0.67	0.952381	1.30318	3.40864	0.799532	0.877368
2	8.08263	6.84579	6.9305	6.77043	7.50295	6.02256	3.07	4.36642	5.81627	6.14525	5.95215
3	7.11813	8.87574	9.50504	9.74863	8.36925	8.49873	5.66	7.0308	6.14602	5.68374	10.5556	8.82293
4	3.53412	6.3234	5.18349	5.10899	4.95529	6.87668	5.13	5.52498	3.86619	4.0652	6.00887	5.76375
5	1.42926	3.72365	2.91517	2.88156	2.6452	3.00892	4.3	3.30614	3.17494	2.70876	2.38202	3.3934
6	0.620705	1.76991	1.28205	1.01121	1.25374	1.70237	2.55	1.82474	1.31775	1.6129	0.872679	1.45183
7	0.488946	0.647858	0.622914	0.538561	0.839886	1.08204	1.83	1.47524	0.971712	0.882957	0.830527
8	0.588235	0.786397	0.697928	0.560828	0.802998	1.43914	1.21	1.08838	0.826446	0.825423	1.22117	1.28147
9	0	0.468227	0.642398	0.730869	0.967628	1.77742	1.14	1.0501	0.980819	0.80289	1.7317	1.53408
NCOs
	pch2		pch2 mlh3		pch2 mms4-mn yen1 slx1		WT		mlh3		mms4-mn yen1 slx1
hours in meiosis	experiment 1	experiment 2	experiment 1	experiment 2	experiment 1	experiment 2	experiment 1	experiment 2	experiment 1	experiment 2	experiment 1	experiment 2
0	0	0	0	0	0	0	0	0	0	0	0	0
1	0	0	0	0	0	0	0	0	0	0	0	0
2	0.11	0	0	0	0	0	0	0	0	0	0
3	1.78	1.04	1.05	1.22	0.86	0.56	0.16	0.67	0.51	0.44	0.85	0.57
4	5.9	3.73	3.2	4.52	4.13	3.53	1.56	2.98	2.09	1.76	4.81	2.85
5	12	9.11	8.42	12.04	9.17	8.3	6.24	11.39	7.57	7.56	12.94	10.61
6	19.17	17.92	18.15	24.01	14.93	14.97	14.96	20.64	14.72	14.19	18.93	17.26
7	25.37	24.29	23.69	28.22	15.94	17.36	19.56	23.78	19.76	17.37	20.17	19.84
8	26.29	26.61	26.49	29.12	19.66	16.63	15.81	24.97	20.75	20.36	21.53	22.44
9	24.79	26.2	27.54	28.82	19.86	17.61	20.32	24.74	19.63	20.51	22.06	22.11
C) Steady state DSBs and NCOs at URA3 (% total lane signal)
DSBs
hours in meiosis	pch2		pch2 mlh3		pch2 mms4-mn yen1 slx1		WT		mlh3		mms4-mn yen1 slx1
	experiment 1	experiment 2	experiment 1	experiment 2	experiment 1	experiment 2	experiment 1	experiment 2	experiment 1	experiment 2	experiment 1	experiment 2
0	0	0	0	0	0	0	0	0	0	0	0	0
1	2.35916	1.47493	1.7537	3.0359	0	0	2.67872	2.26449	3.09071	3.01607	0	3.02083
2	3.87191	4.60775	5.70424	6.46485	4.36119	7.59846	6.66667	4.80648	6.97383	4.9685	5.25173	6.72907
3	8.41356	11.3781	10.6335	12.166	7.51234	10.4658	11.0471	8.52669	10.7704	7.44804	10.2134	10.8783
4	6.91039	6.84992	6.44386	5.17711		6.10248	14.2297	8.40936	9.93538	6.16218	8.40009	8.78412
5	3.14693	4.4665	4.40181	3.21955	5.22976	3.40712	3.39885	3.37079	3.04321	3.30033	6.47044	5.34254
6	1.91138	2.5784	2.13191	2.48296	2.44825	1.56459	2.26904	1.90217	1.8002	2.20921	3.97129	3.42015
7	1.44221	2.14529	1.44496	2.19436	1.62983	1.0617	2.11588	1.30528	1.31936	1.76118	2.63273	2.25893
8	1.0858	1.7076	1.09395	1.54525	1.60462	1.0628	1.64915	1.14363	1.2706	1.36933	2.40565
9	1.14084	1.70264	0.968421	1.44995	1.79872	1.7998	1.15498	1.03442	1.15891	1.36381	2.39719	3.08588
NCOs
	pch2		pch2 mlh3		pch2 mms4-mn yen1 slx1		WT		mlh3		mms4-mn yen1 slx1
hours in meiosis	experiment 1	experiment 2	experiment 1	experiment 2	experiment 1	experiment 2	experiment 1	experiment 2	experiment 1	experiment 2	experiment 1	experiment 2
0	0	0	0	0	0	0	0	0	0	0	0	0
1	0.08	0.11	0	0	0.26	0	0	0.08	0	0	0	0.07
2	0.09	0	0	0	0	0.08	0.01	0.01	0	0	0	0.26
3	0.52	0.2	0.13	0.15	0.16	0	0.45	0.68	0.64	0.5	0.11	0.41
4	3.12	1.68	2.16	1.55		1.14	1.69	3.13	3.75	2.24	1.26	2.11
5	10.4	5.46	6.69	5.8	4.69	4.97	8.88	14.14	14.3	11.68	5.79	9.55
6	21.59	15.31	16.4	14.11	11.61	11.56	17.71	22.24	21.15	19.98	13.96	16.48
7	27.52	22.38	22.18	24	17.86	15.86	20.89	24.1	23.71	22.84	18.61	19.8
8	29.8	23.13	25.79	26.16	20.47	19.27	19.75	23.82	23.77	24.75	21.1	22.75
9	30.86	22.86	25.71	27.2	20.96	20.53	21.12	23.81	23.18	23.96	22.66	22.73

## Sheet: Figure 5
Figure 5
A) COs at URA3 and HIS4 in WT and spo11 (% total lane signal)
	SPO11, URA3		SPO11, HIS4		spo11, URA3		spo11, HIS4
hours in meiosis	experiment 1	experiment 2	experiment 1	experiment 2	experiment 1	experiment 2	experiment 1	experiment 2
0	0	0	0	0	0	0	0	0
1	0	0	0	0	0	0	0	0
2	0	0	0	0	0	0	0	0
3	0	0	0	0	0	0	0	0
4	0	0	0	0	0.26	0.135	0	1.04
5	3.77	3.905	2.26	4.535	2.045	1.6	1.415	2.665
6	7.51	6.53	7.02	9.55	3.1	2.765	2.315	3.77
7	8.285	7.415	8.63	11.365	3.965	3.455	2.86	4.165
8	7.895	7.445	9.61	11.855	4.405	3.935	3.345	4.735
9	7.99	7.095	8.09	11.55	4.48	4.41	3.9	5.135
B) COs at HIS4 (% total lane signal)
	spo11		spo11 mlh3		spo11 mms4-mn yen1 slx1
hours in meiosis	experiment 1	experiment 2	experiment 1	experiment 2	experiment 1	experiment 2
0	0	0	0	0	0	0
1	0	0	0	0	0	0
2	0	0	0	0	0	0
3	0	0	0	0	0	0
4	0	1.04	1.05	0.98	0	0.43
5	1.415	2.665	2.64	2.625	1.17	1.065
6	2.315	3.77	3.39	3.625	1.87	1.885
7	2.86	4.165	3.76	4.195	2.205	2.68
8	3.345	4.735	4.305	4.21	2.895	3.265
9	3.9	5.135	4.57	4.71	3.375	3.125
C) COs at URA3 (% total lane signal)
	spo11		spo11 mlh3		spo11 mms4-mn yen1 slx1
hours in meiosis	experiment 1	experiment 2	experiment 1	experiment 2	experiment 1	experiment 2
0	0	0	0	0	0	0
1	0	0	0	0	0	0
2	0	0	0	0	0	0
3	0	0	0	0	0	0
4	0.26	0.135	0.555	0.95	0	0.025
5	2.045	1.6	1.75	2.16	0.94	0.795
6	3.1	2.765	2.67	3.225	1.415	1.46
7	3.965	3.455	3.155	3.24	1.84	2.06
8	4.405	3.935	3.605	3.63	2.205	2.4
9	4.48	4.41	3.925	3.755	2.62	2.955
Figure 5-Figure Supplement 1
A) Remaining chromosome material at 9 hours (% of 0 hours)
	SPO11, URA3		SPO11, HIS4		spo11, URA3		spo11, HIS4
hours in meiosis	experiment 1	experiment 2	experiment 1	experiment 2	experiment 1	experiment 2	experiment 1	experiment 2
0	100	100	100	100	100	100	100	100
1	99.7406	94.6375	103.81	95.8222	92.0173	101.424	103.26	100.437
2	89.6307	83.257	98.1482	84.7632	83.5011	87.1837	91.9212	80.498
3	64.4423	53.3761	76.8625	63.0514	56.3715	57.4027	77.6158	50.5417
4	42.0263	22.4215	61.5368	42.661	34.8161	34.2573	59.4124	30.6216
5	28.8509	23.2086	41.6986	21.8366	17.7599	24.6453	37.4845	16.6698
6	20.1887	12.1068	23.6697	9.15341	11.8636	15.4565	28.9331	9.38985
7	16.4026	8.79852	16.2197	5.06346	8.79353	11.4188	20.8147	6.46265
8	15.8271	10.1	15.049	4.6375	8.64401	11.4566	18.5116	5.03707
9	17.1757	12.8136	15.6024	4.63389	10.1791	11.9672	18.2021	5.47424
B) Fraction of VDE DSBs repaired as interhomolog recombinants (%)
	SPO11, URA3		SPO11, HIS4		spo11, URA3		spo11, HIS4
hours in meiosis	experiment 1	experiment 2	experiment 1	experiment 2	experiment 1	experiment 2	experiment 1	experiment 2
0	0	0	0	0	0	0	0	0
1	0	0	0	0	0	1	0	0
2	0	0	0	0	0	1	0	0
3	1	2	0	1	1	1	0	5
4	4	7	4	7	11	12	7	22
5	32	41	21	35	36	33	27	44
6	62	67	54	66	51	50	44	57
7	72	72	71	77	62	62	46	62
8	70	70	63	81	67	69	61	65
9	72	71	72	80	66	70	61	69
C) Steady-state VDE DSB levels (% of total lane signal)
	SPO11, URA3		SPO11, HIS4		spo11, URA3		spo11, HIS4
hours in meiosis	experiment 1	experiment 2	experiment 1	experiment 2	experiment 1	experiment 2	experiment 1	experiment 2
0	0	0	0	0	0	0	0	0
1	2.67872	2.26449	0.67	0.952381	2.11239	0	0.571195	0.96
2	6.66667	4.80648	3.07	4.36642	5.06485	5.40936	2.95547	6.28
3	11.0471	8.52669	5.66	7.0308	8.04324	8.79141	5.33971	7.81
4	14.2297	8.40936	5.13	5.52498	7.31367	7.97497	6.16512	4.66
5	3.39885	3.37079	4.3	3.30614	3.49028	3.94191	4.22408	2.61
6	2.26904	1.90217	2.55	1.82474	1.89531	2.47565	2.61851	2.04
7	2.11588	1.30528	1.83	1.47524	1.52228	1.62847	1.89403	1.99
8	1.64915	1.14363	1.21	1.08838	1.31518	1.08119	1.50867	1.4
9	1.15498	1.03442	1.14	1.0501	0.946664	0.998167	1.2152	1.25
D) NCOs (% of total lane signal)
	SPO11, URA3		SPO11, HIS4		spo11, URA3		spo11, HIS4
hours in meiosis	experiment 1	experiment 2	experiment 1	experiment 2	experiment 1	experiment 2	experiment 1	experiment 2
0	0	0	0	0	0	0	0	0
1	0	0.08	0	0	0	0.26	0	0
2	0.01	0.01	0	0	0	0.3	0	0
3	0.45	0.68	0.16	0.67	0.53	0.51	0	2.5
4	1.69	3.13	1.56	2.98	4.81	4.57	2.85	10.1
5	8.88	14.14	6.24	11.39	13.65	11.67	9.74	19.56
6	17.71	22.24	14.96	20.64	19.44	17.18	15.76	24.97
7	20.89	24.1	19.56	23.78	23.68	21.31	15.84	26.66
8	19.75	23.82	15.81	24.97	24.93	23.82	21.47	27.41
9	21.12	23.81	20.32	24.74	24.62	23.78	20.96	29.01
E) Steady state DSBs and NCOs at HIS4 (% of total lane signal)
DSBs
hours in meiosis	spo11		spo11 mlh3		spo11 mms4-mn yen1 slx1
	experiment 1	experiment 2	experiment 1	experiment 2	experiment 1	experiment 2
0	0	0	0	0	0	0
1	0.571195	0.96	1.45251	1.23383	0.619835	0.969064
2	2.95547	6.28	5.45521	6.22732	4.43341	4.71014
3	5.33971	7.81	6.07757	7.70505	8.60424	10.4239
4	6.16512	4.66	3.78628	4.83189	5.6421	6.2099
5	4.22408	2.61	2.20676	3.4763	3.38313	2.91185
6	2.61851	2.04	2.17652	2.98913	1.82686	1.85671
7	1.89403	1.99	1.72414	2.61228	1.48567	1.18755
8	1.50867	1.4	1.40224	1.84258	1.45693	1.09912
9	1.2152	1.25	1.35961	1.85185	1.59519	1.43244
NCOs
	spo11		spo11 mlh3		spo11 mms4-mn yen1 slx1
hours in meiosis	experiment 1	experiment 2	experiment 1	experiment 2	experiment 1	experiment 2
0	0	0	0	0	0	0
1	0	0	0	0	0	0.03
2	0	0	0	0.06	0	0
3	0	2.5	2.27	1.55	0.53	1.3
4	2.85	10.1	12.46	10.16	4.94	10.02
5	9.74	19.56	21.34	19.37	14.15	18.71
6	15.76	24.97	25.61	25.26	20.23	24.14
7	15.84	26.66	26.94	27.9	23.4	28.8
8	21.47	27.41	28.5	28.01	25.91	27.04
9	20.96	29.01	28.82	28.69	27.3	29.06
F) Steady state DSBs and NCOs at URA3 (% of total lane signal)
DSBs
hours in meiosis	spo11		spo11 mlh3		spo11 mms4-mn yen1 slx1
	experiment 1	experiment 2	experiment 1	experiment 2	experiment 1	experiment 2
0	0	0	0	0	0	0
1	2.11239	0	0	2.05754	0	0
2	5.06485	5.40936	3.90498	6.899	4.13635	3.39719
3	8.04324	8.79141	7.5606	8.8832	8.10707	7.25486
4	7.31367	7.97497	7.47951	5.36927	8.29129	7.49071
5	3.49028	3.94191	4.33954	3.61395	6.3745	3.92743
6	1.89531	2.47565	2.62774	2.54098	3.23922	2.55639
7	1.52227	1.62847	1.55551	1.7775	2.61342	2.03903
8	1.31518	1.08119	1.39137	1.18853	2.09016	1.06383
9	0.946664	0.998167	1.11709	1.23883	2.05309	1.68885
NCOs
	spo11		spo11 mlh3		spo11 mms4-mn yen1 slx1
hours in meiosis	experiment 1	experiment 2	experiment 1	experiment 2	experiment 1	experiment 2
0	0	0	0	0	0	0
1	0	0.26	0.1	0.23	0	0.07
2	0	0.3	0.08	0.57	0	0.02
3	0.53	0.51	0.52	0.82	0.11	0.34
4	4.81	4.57	5.14	8.77	2.55	4.21
5	13.65	11.67	14.08	14.74	9.99	11.89
6	19.44	17.18	20.47	20.26	16.49	19.27
7	23.68	21.31	23.1	19.62	19.61	22.71
8	24.93	23.82	24.57	22.58	19.43	23.36
9	24.62	23.78	25.41	23.02	20.52	24.45
