# Supplementary figures and images for: Local chromosome context is a major determinant of crossover pathway biochemistry during budding yeast meiosis
Source: eLife journal article supplement (doi:10.7554/elife.19669), 2016-11-18

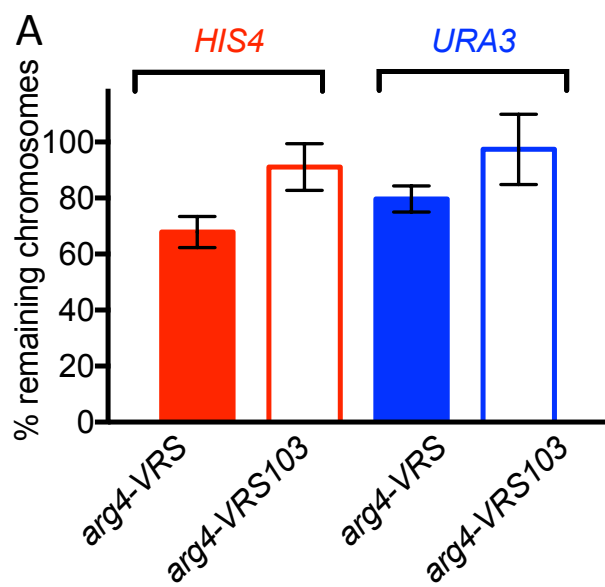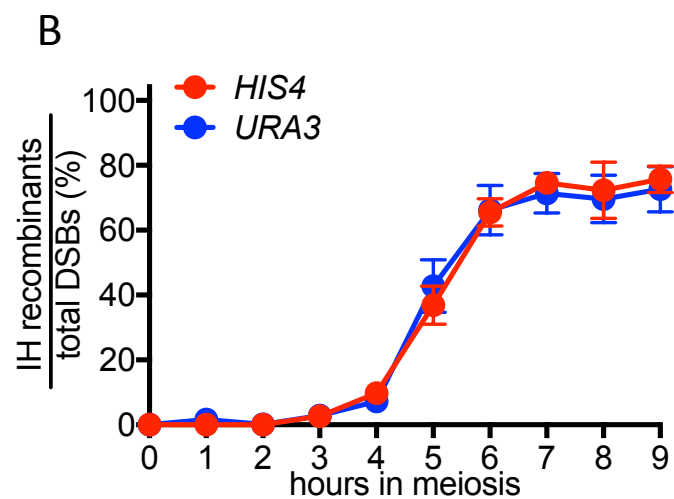

Figure 2—Figure Supplement 1

Supplement: supp [file elife-19669-supp-v1.zip]

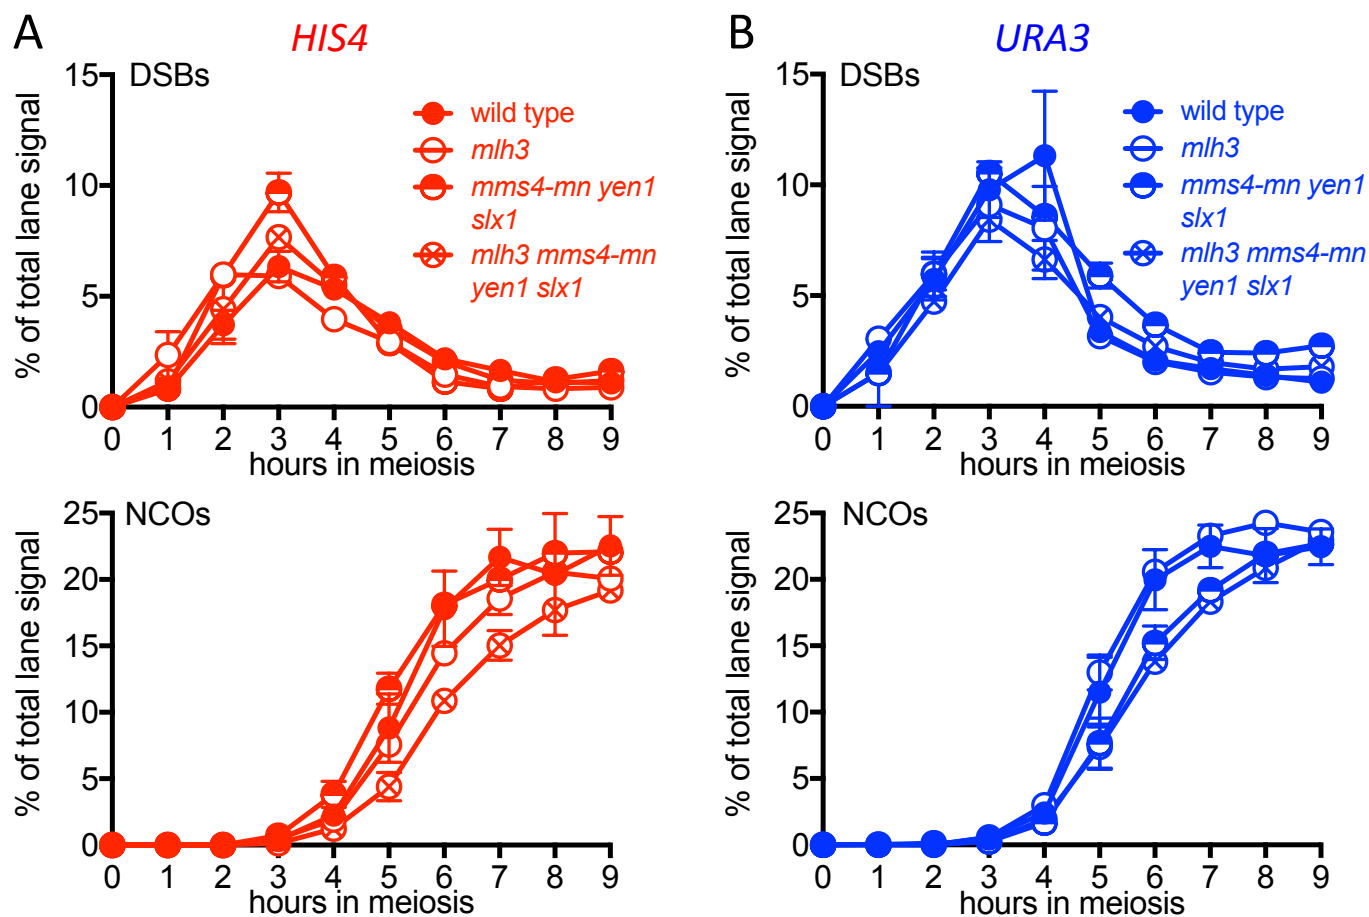

Figure 3—Figure Supplement 1

Supplement: supp [file elife-19669-supp-v1.zip]

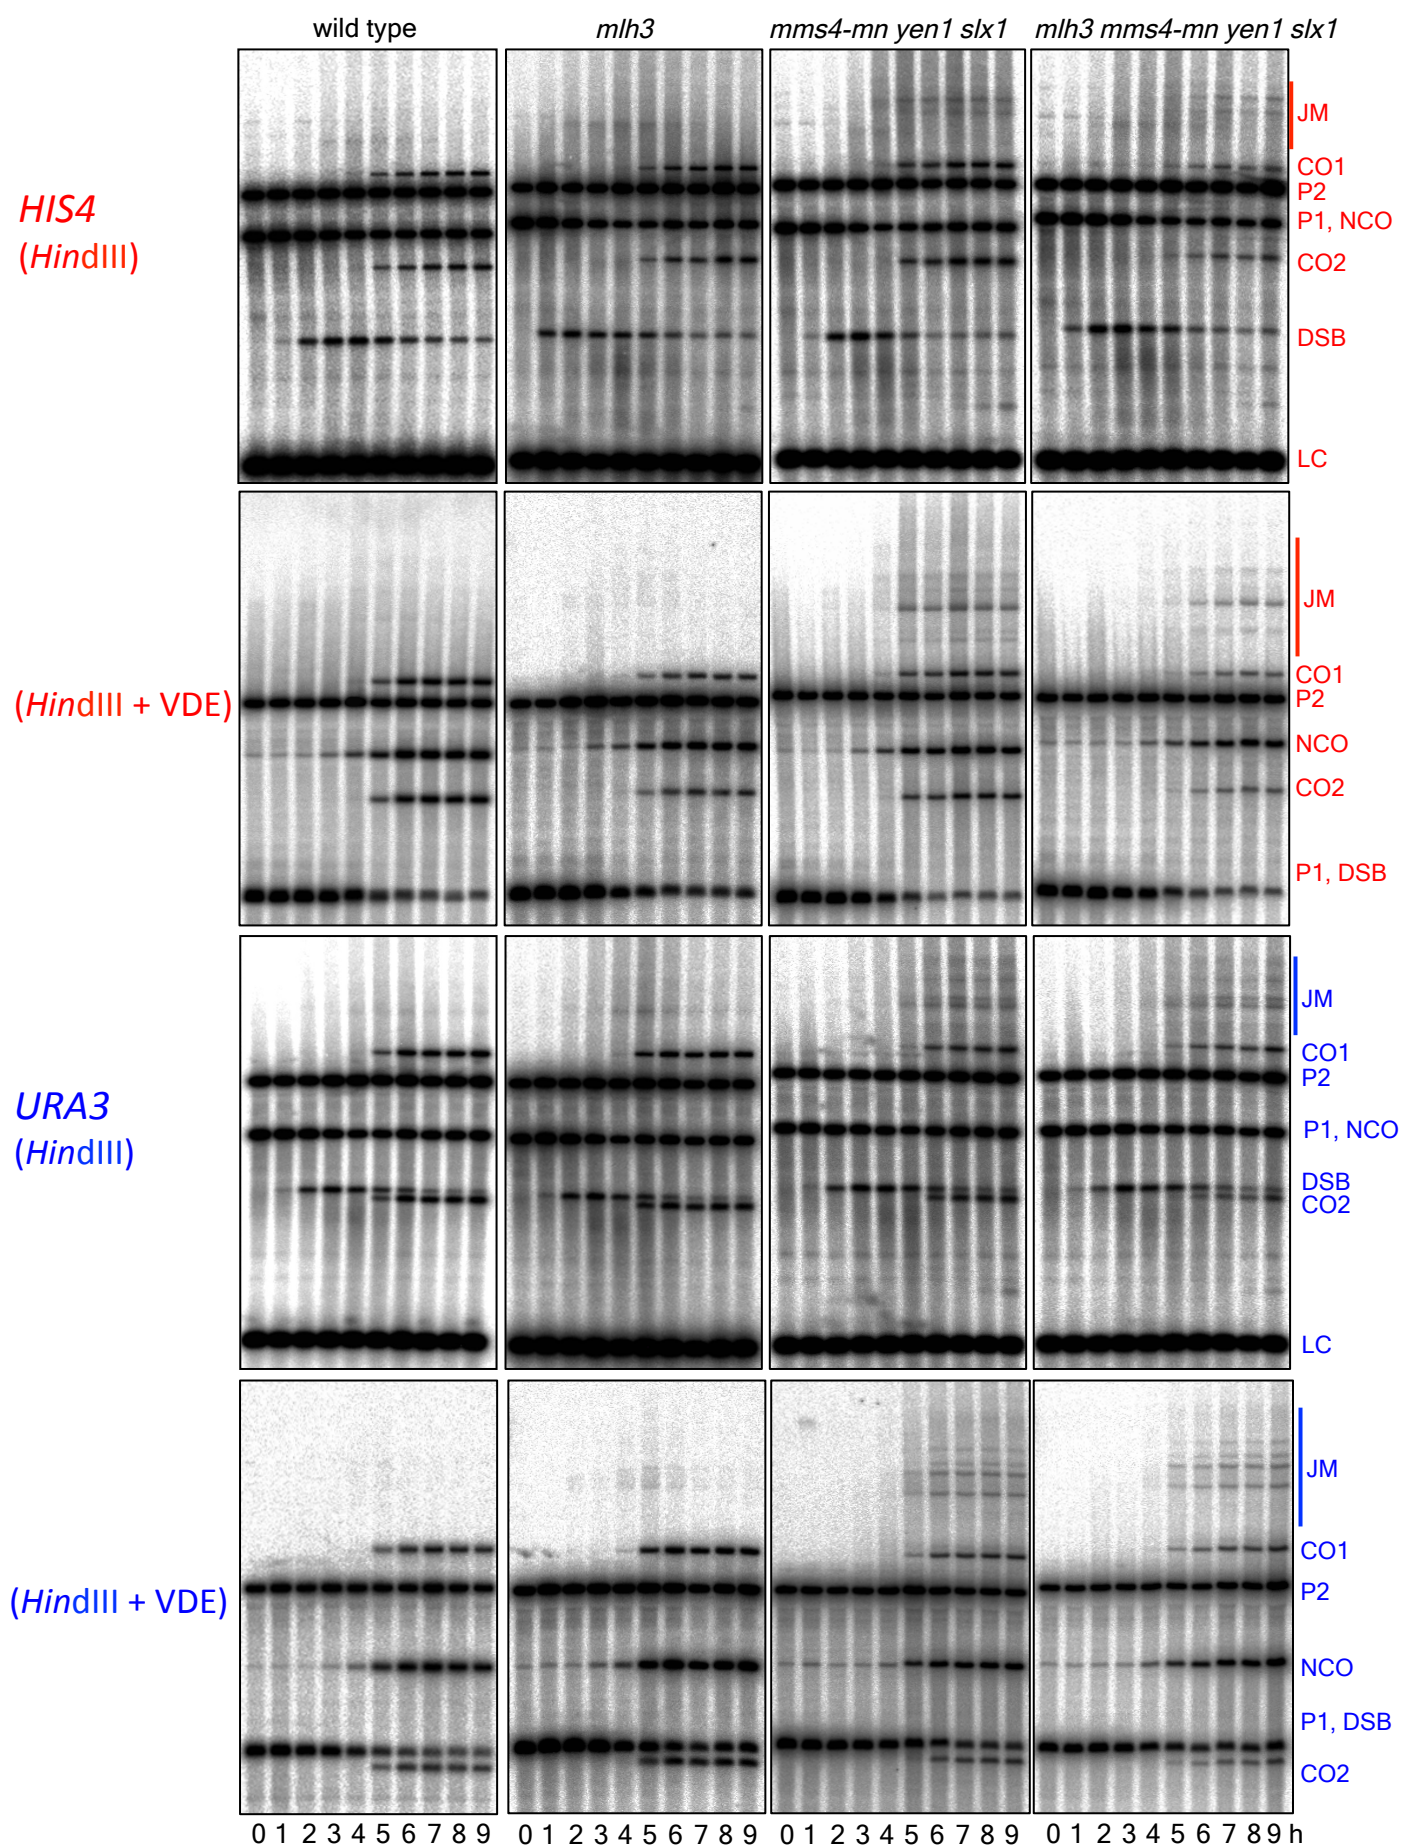

Figure 3—Figure Supplement 2

Supplement: supp [file elife-19669-supp-v1.zip]

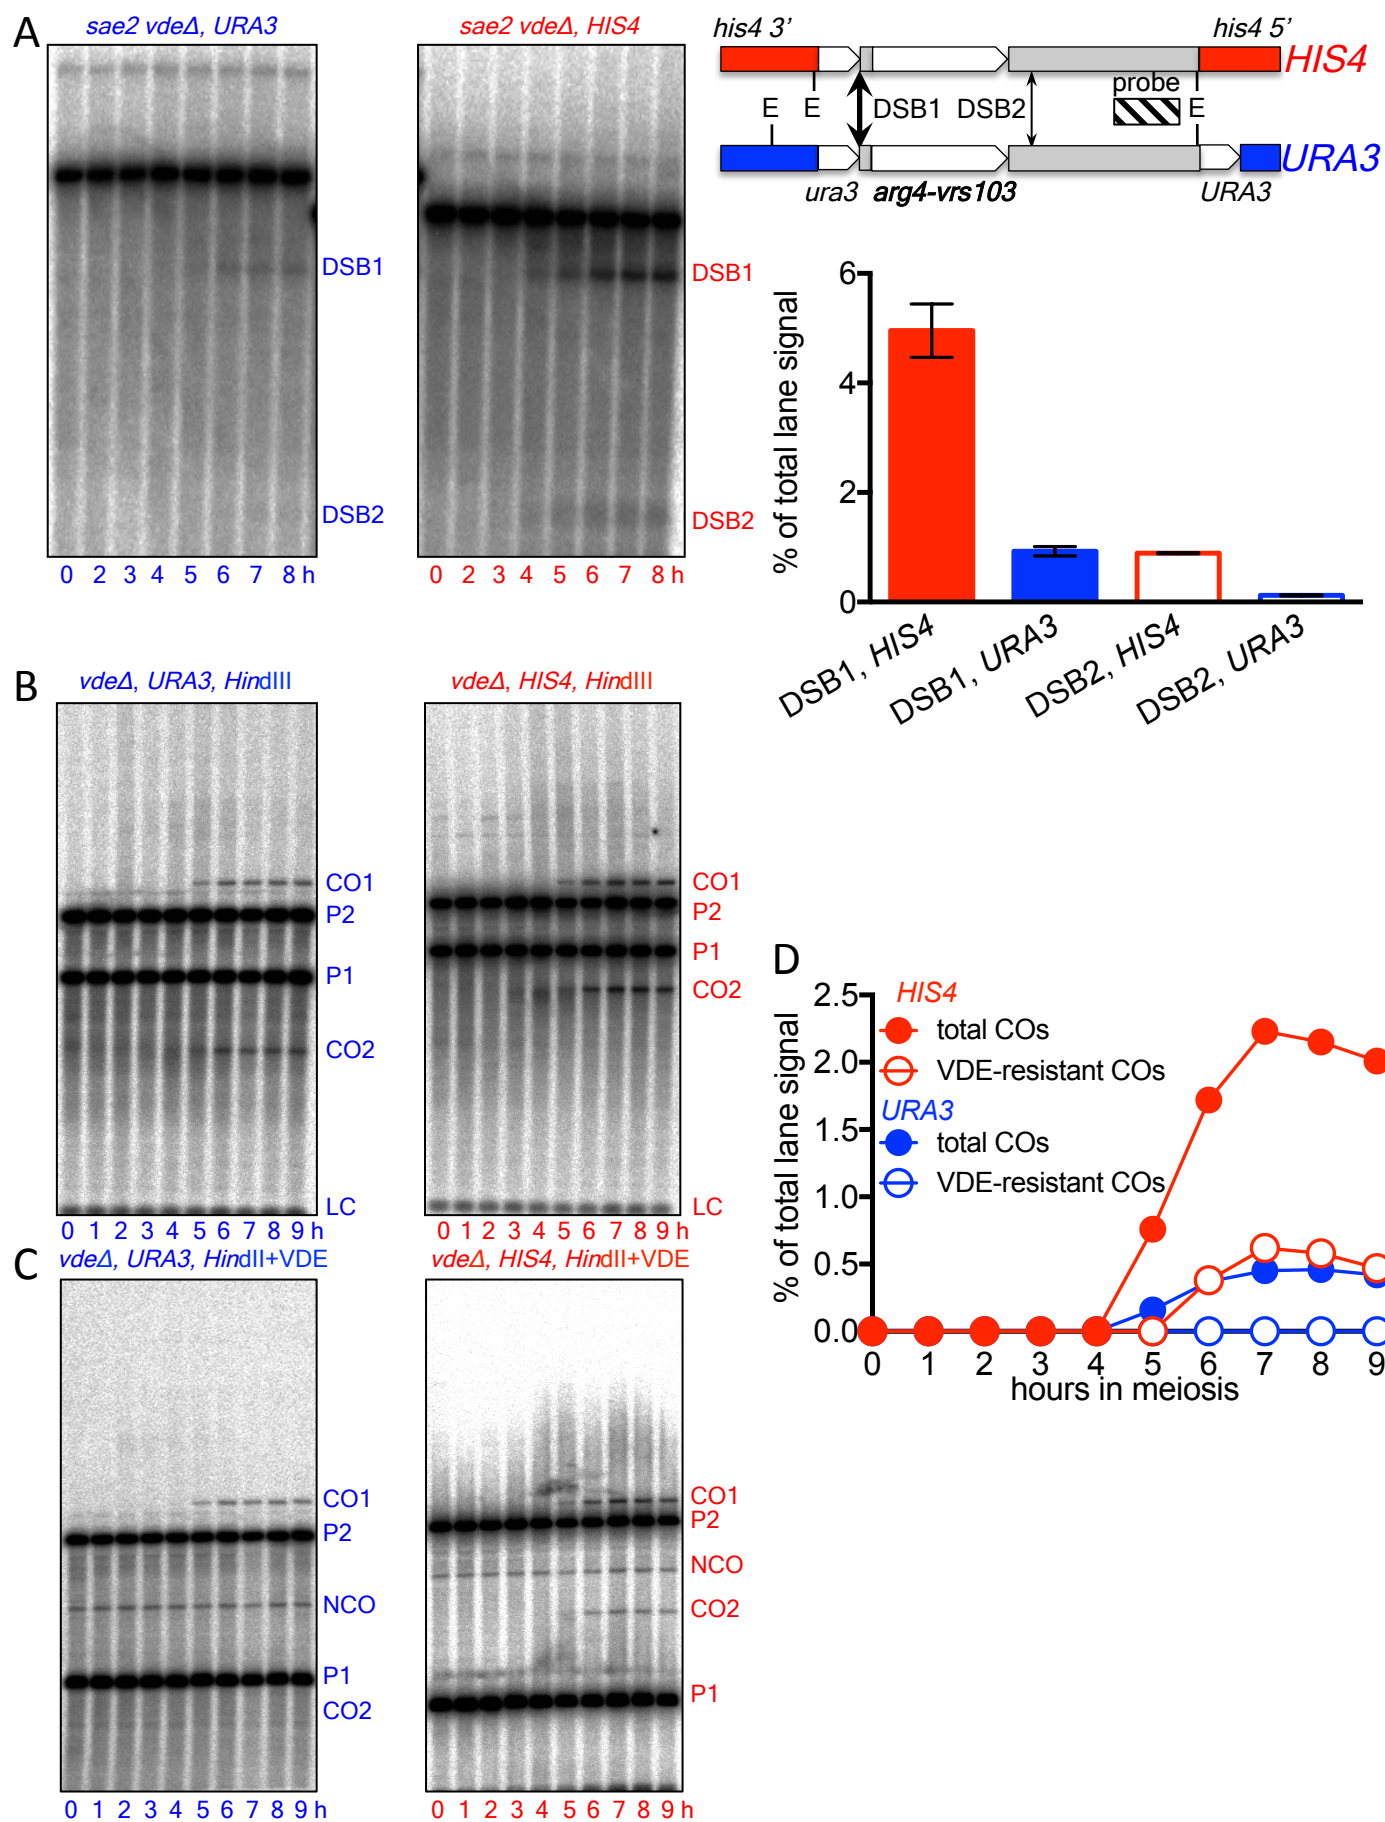

Figure 1—Figure Supplement 1

Supplement: supp [file elife-19669-supp-v1.zip]

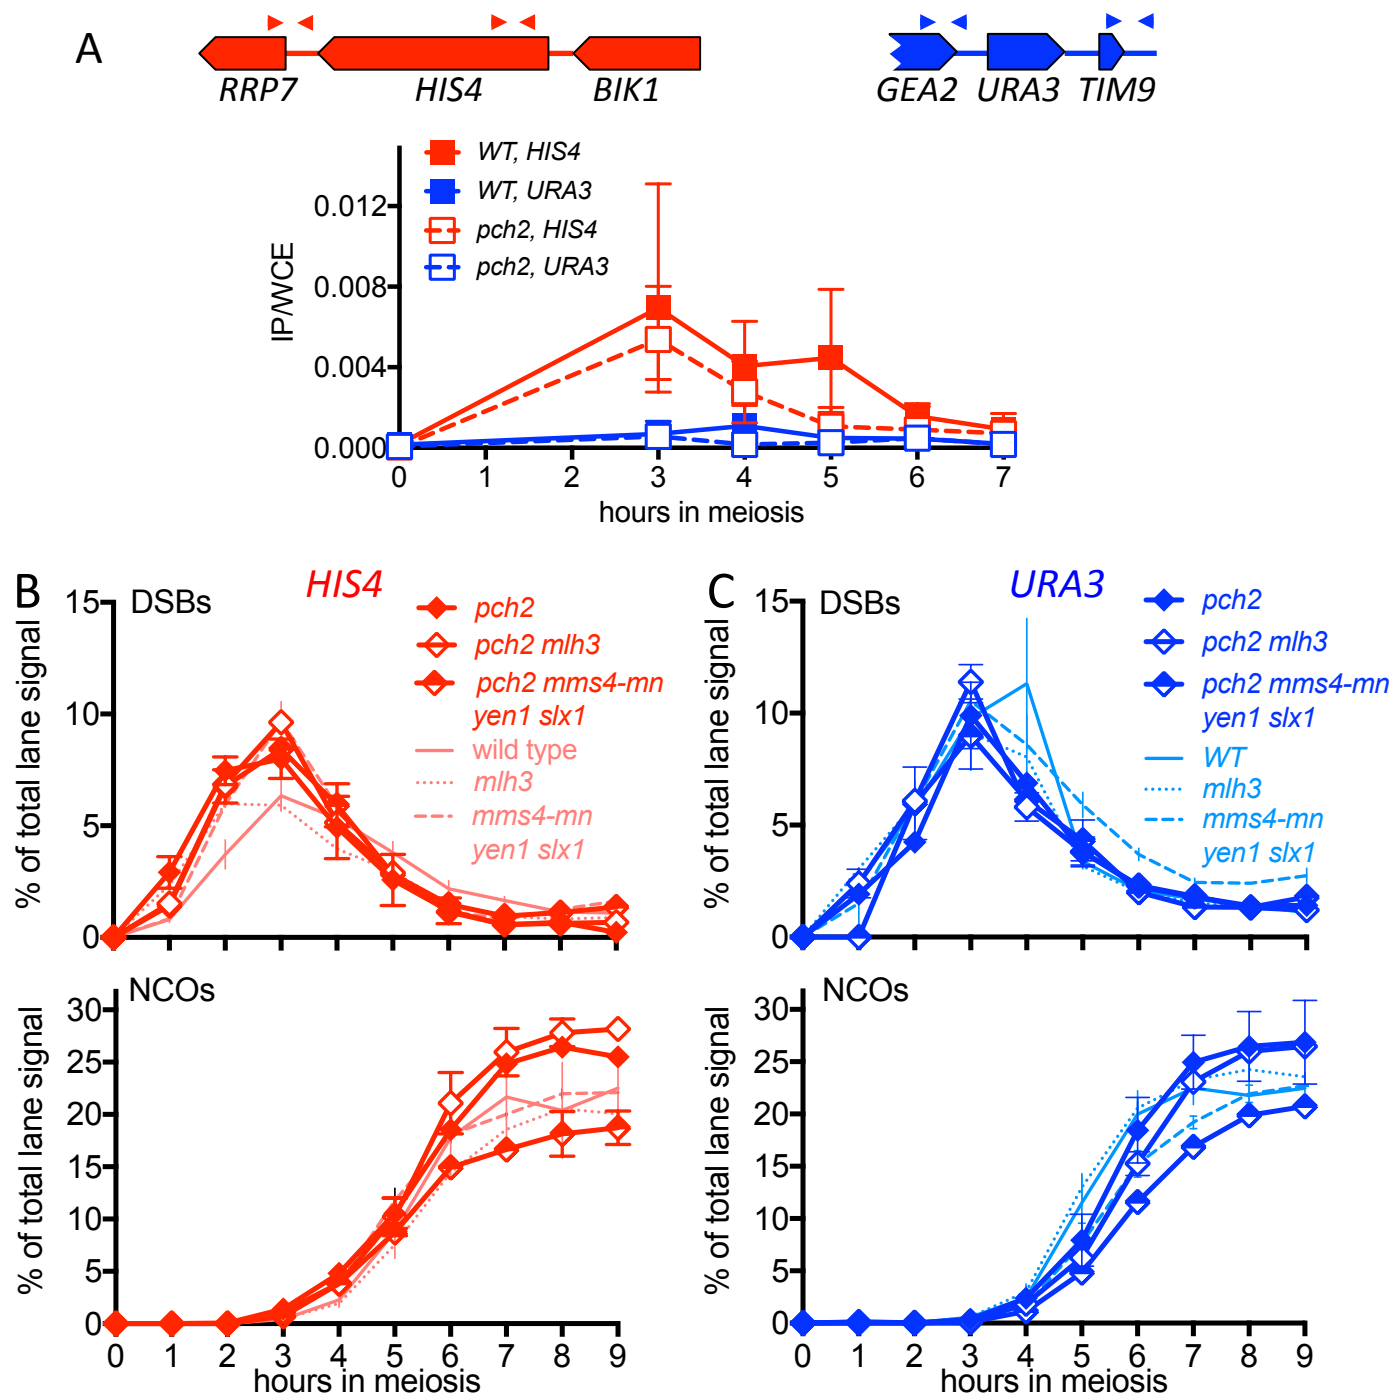

Figure 4—Figure Supplement 1

Supplement: supp [file elife-19669-supp-v1.zip]

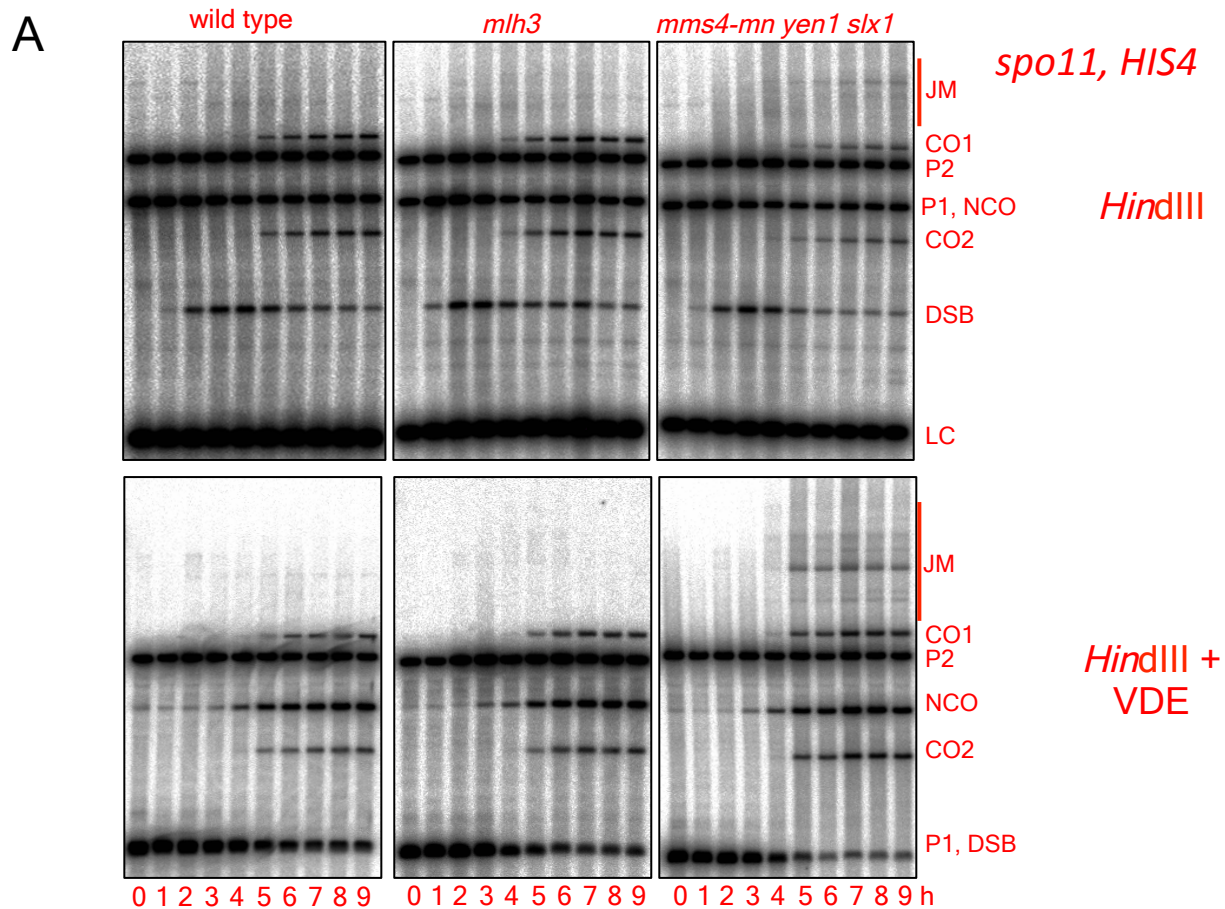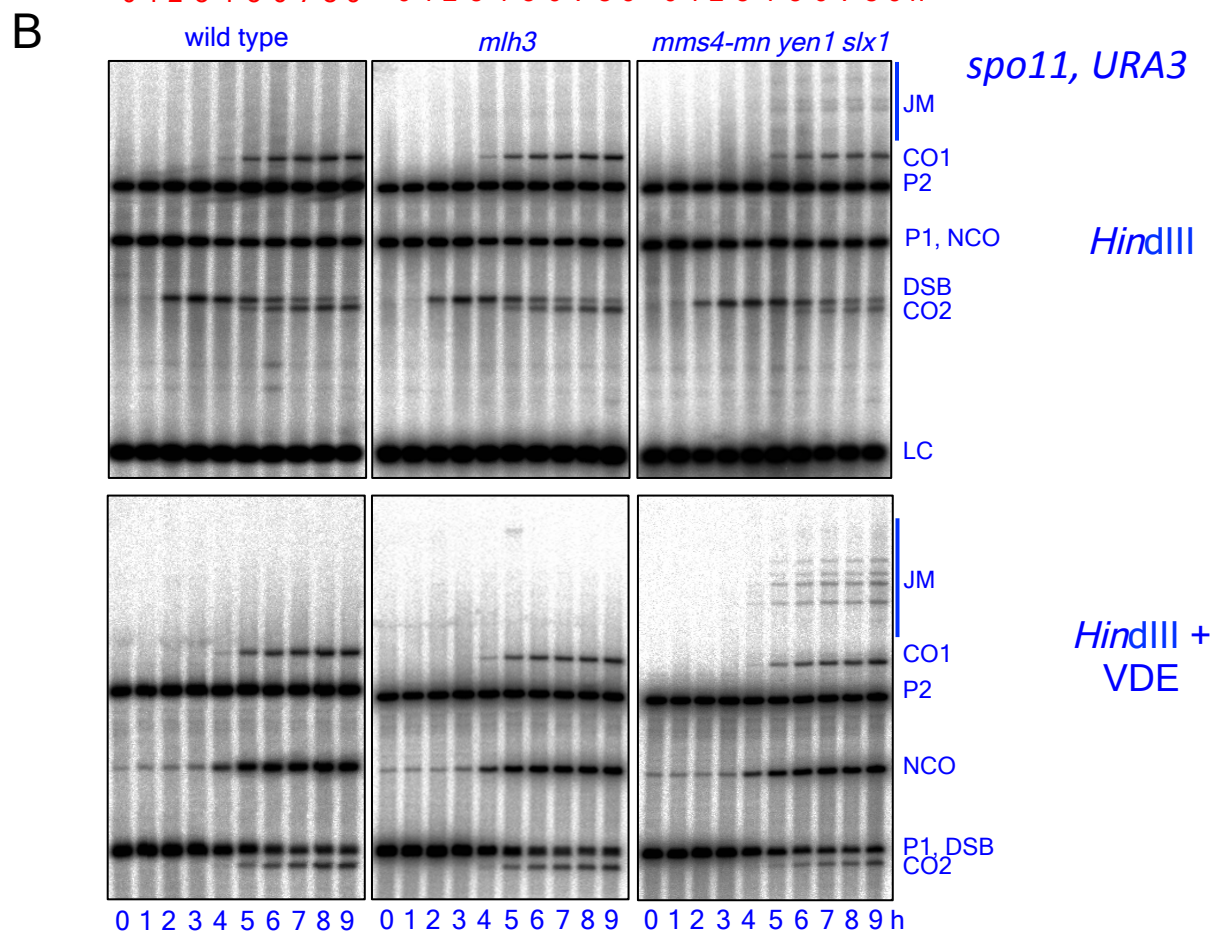

Figure 5—figure supplement 2

Supplement: supp [file elife-19669-supp-v1.zip]

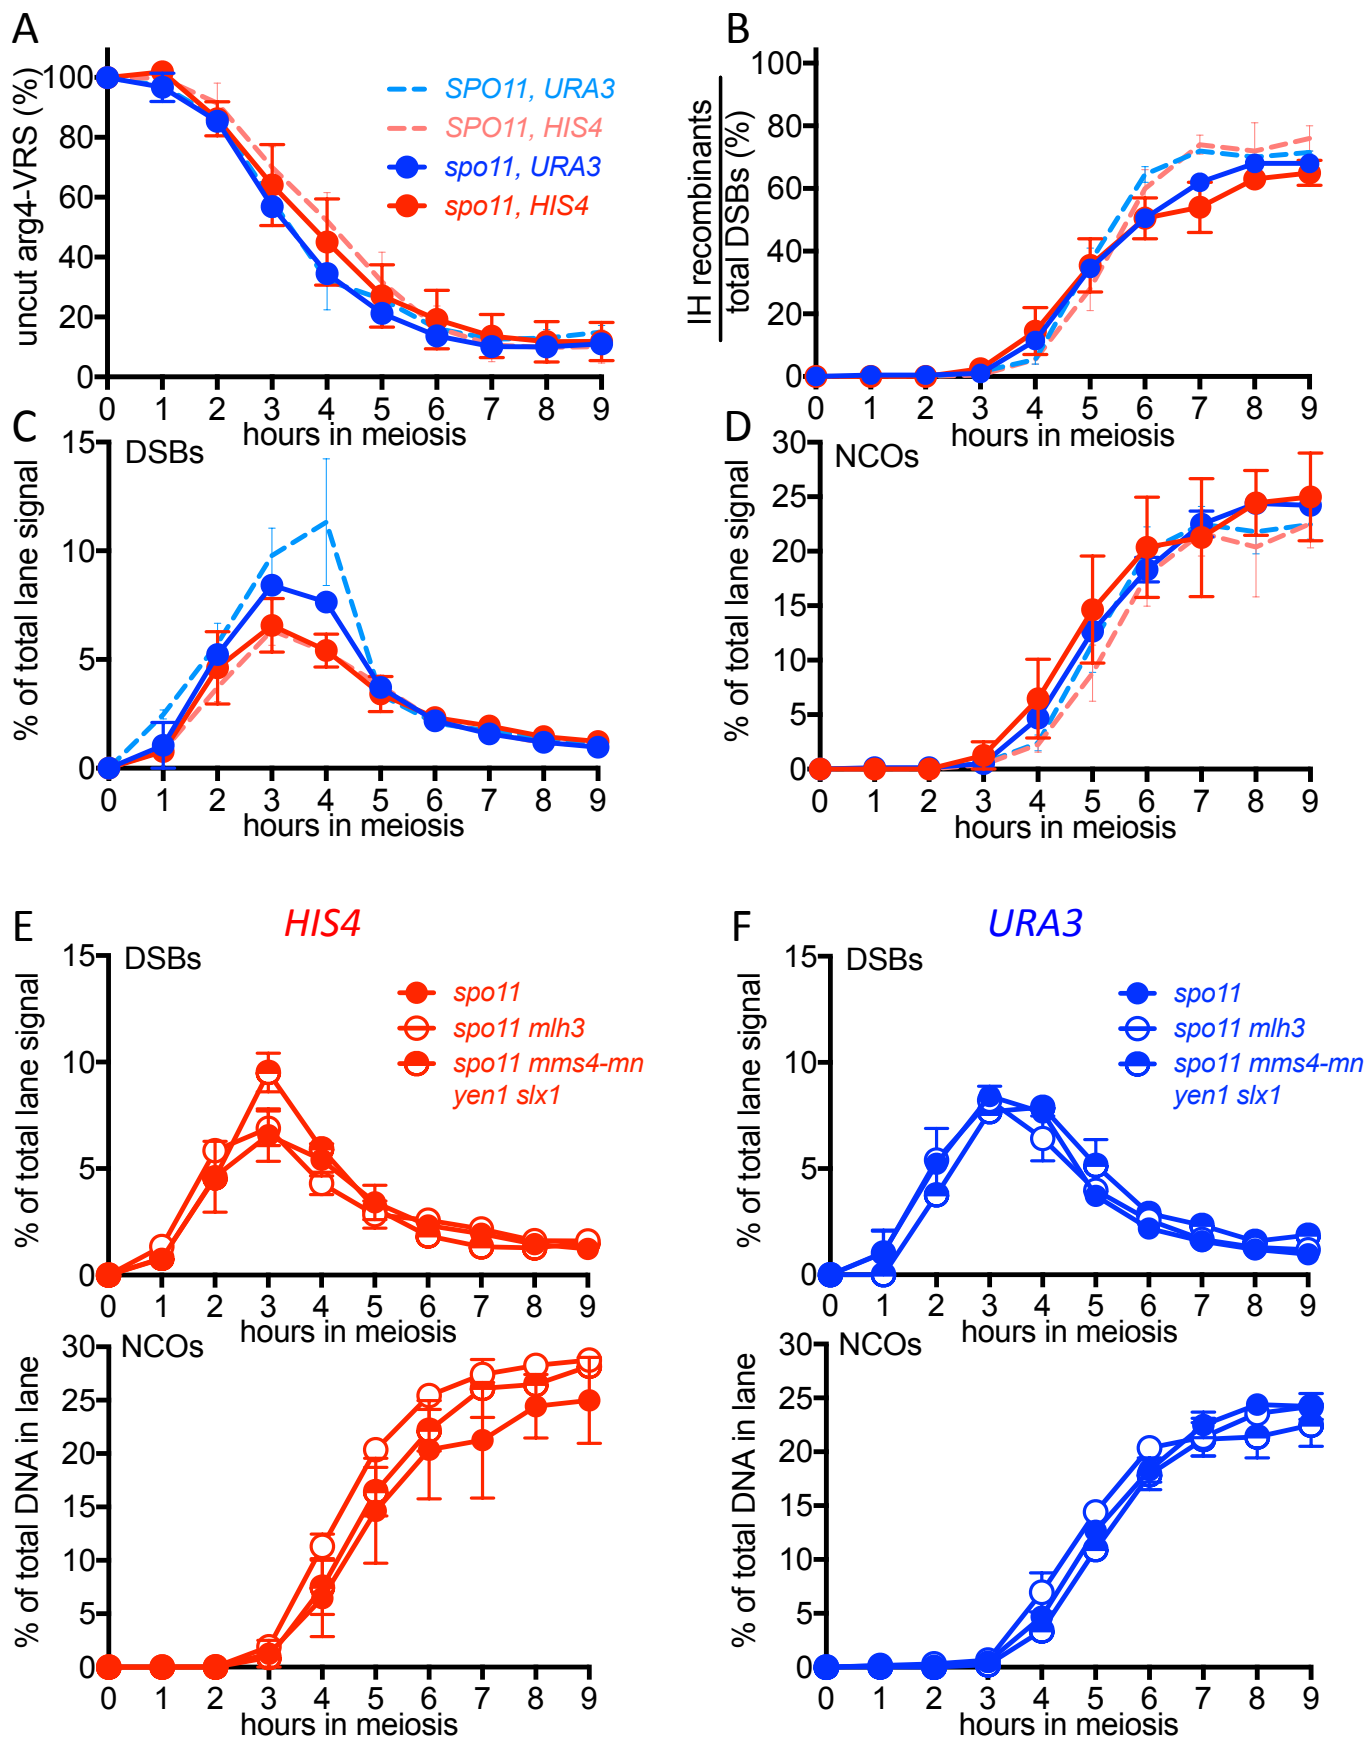

Figure 5—figure supplement 1

Supplement: supp [file elife-19669-supp-v1.zip]

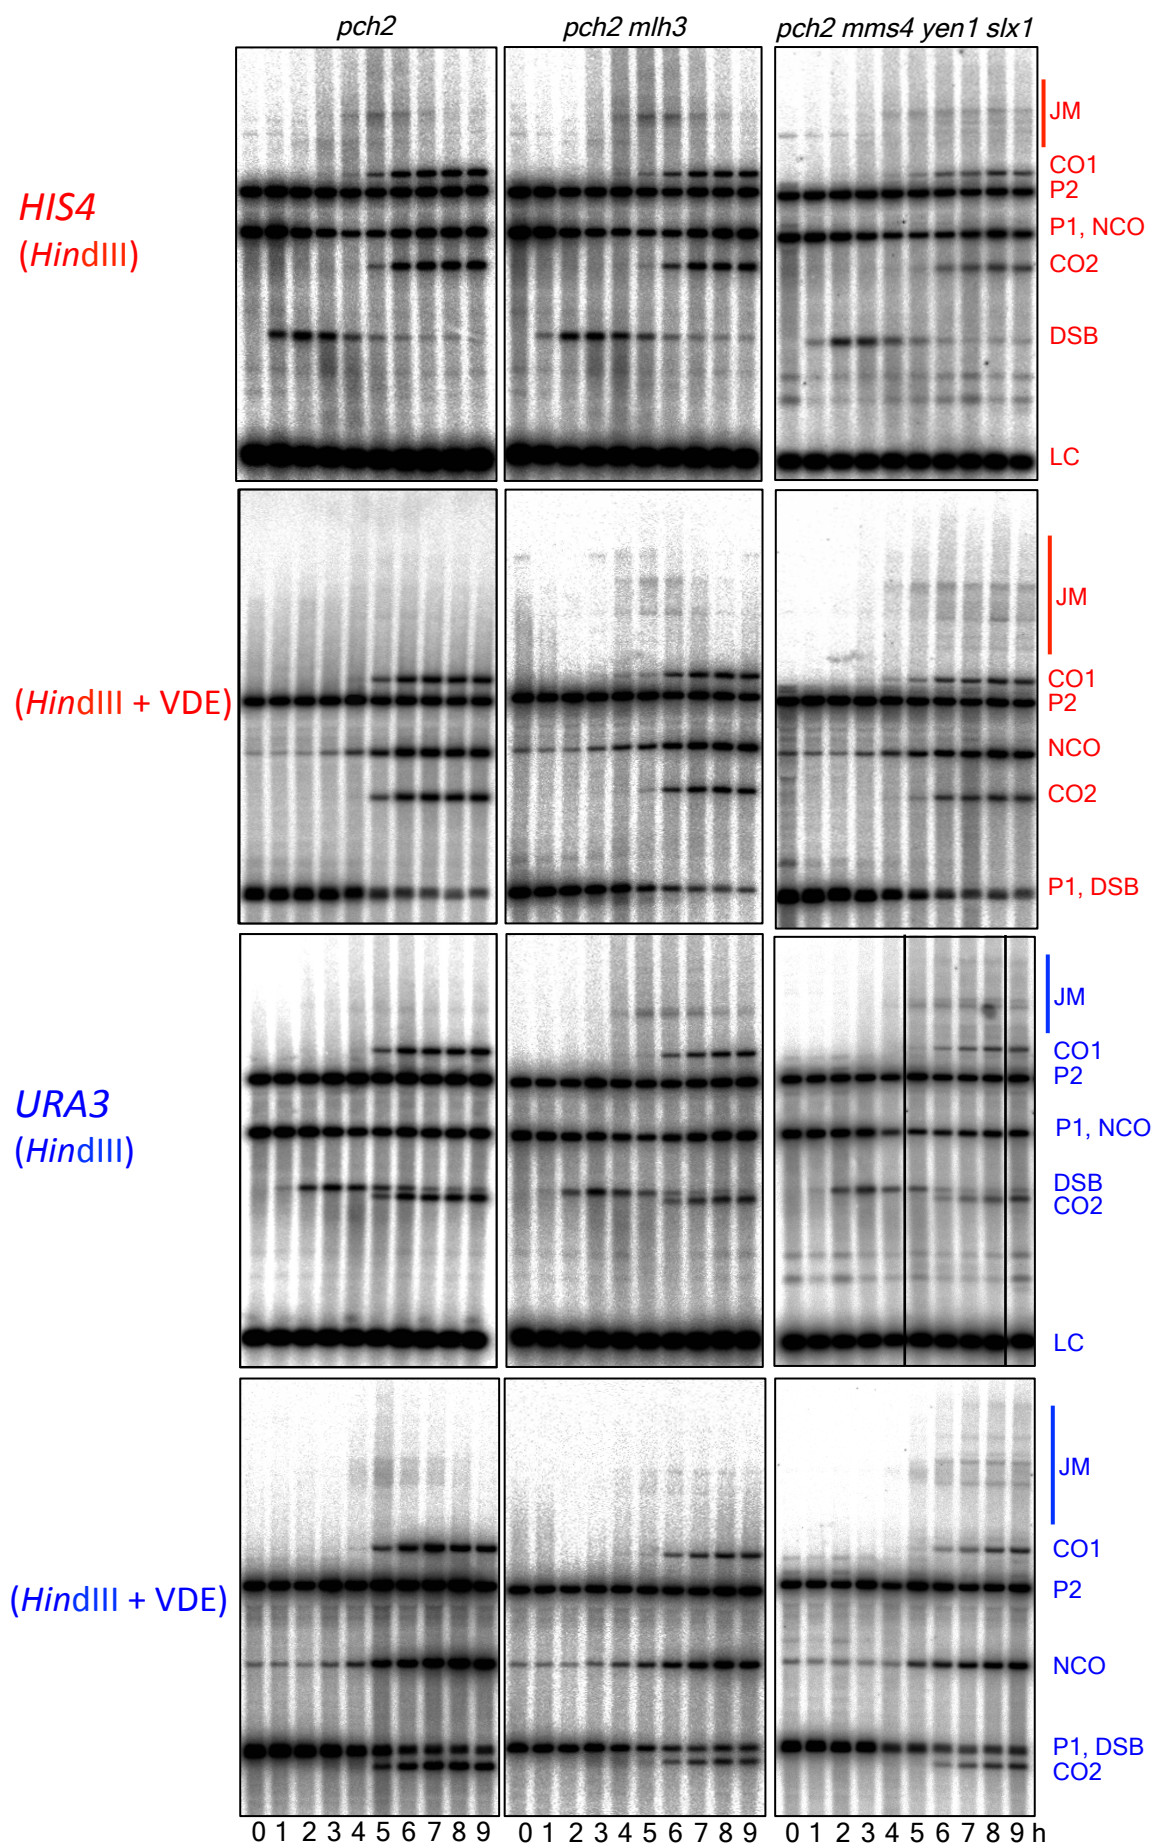

Figure 4—figure supplement 2

Supplement: supp [file elife-19669-supp-v1.zip]
